# Supplementary material
Source: publisher figshare collection journal article supplement (https://frontiersin.figshare.com/ndownloader/files/13662212)
Supplement: Supplementary file 1 [file 13662212]

**Text S1.** **References for Table S1**

Al-Sofyani AA, Naiz GR (2007) A comparative study of the components of the hard coral *Seriatopora hystrix* and the soft coral *Xenia umbellata* along the Jeddah coast, Saudi Arabia. Revista De Biologia Marina Y Oceanografia 42:207-219

Heiss GA (1995) Carbonate production by scleractinian corals at Aqaba, Gulf of Aqaba, Red Sea. Facies 33:19-34

Hughes TP (1987) Skeletal density and growth form of corals. Marine Ecology Progress Series 35:259-266

Jimenez C, Cortes J (1993) Density and compressive strength of the coral *Siderastrea siderea* (Scleractinia, Siderastreidae):  Intraspecific variability. Revista de Biologia Tropical 41:39-43

Madin JS, Anderson KD, Andreasen MH, Bridge TCL, Cairns SD, Connolly SR, Darling ES, Diaz M, Falster DS, Franklin EC, Gates RD, Hoogenboom MO, Huang D, Keith SA, Kosnik MA, Kuo CY, Lough JM, Lovelock CE, Luiz O, Martinelli J, Mizerek T, Pandolfi JM, Pochon X, Pratchett MS, Putnam HM, Roberts TE, Stat M, Wallace CC, Widman E, Baird AH (2016) The Coral Trait Database, a curated database of trait information for coral species from the global oceans. Scientific Data 31: 419-428

Marcelino LA, Westneat MW, Stoyneva V, Henss J, Rogers JD, Radosevich A, Turzhitsky V, Siple M, Fang A, Swain TD, Fung J, Backman V (2013) Modulation of light-enhancement to symbiotic algae by light-scattering in corals and evolutionary trends in bleaching. PLoS ONE 8:1-9

Marshall PA (2000) Skeletal damage in reef corals: relating resistance to colony morphology. Marine Ecology Progress Series 200:177-189

Morgan KM, Kench PS (2012) Skeletal extension and calcification of reef-building corals in the central Indian Ocean. Marine Environmental Research 81:78-82

Swain TD, Vega-Perkins JB, Oestreich WK, Triebold C, DuBois E, Henss J, Baird A, Siple M, Backman V, Marcelino L (2016) Coral bleaching response index: a new tool to standardize and compare susceptibility to thermal bleaching. Global Change Biology 22:2475-2488

Weber JN, White EW (1974) Activation energy for skeletal aragonite deposited by the hermatypic coral *Platygyra* spp. Marine Biology 26:353-359
